# Supplementary material
Source: PubMed Central journal article supplement (PMC4282680)
Supplement: NIHMS648779-supplement-Supplementary_material.pdf [file NIHMS648779-supplement-Supplementary_material.pdf]

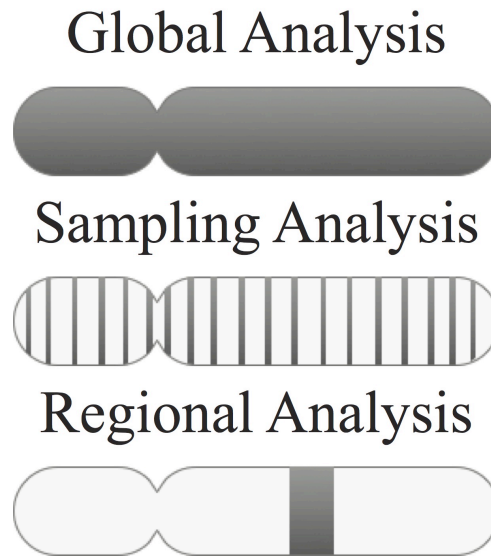

### Supplementary Figure 1

#### Analysis Modalities

The region of the dataset being analyzed is depicted by the dark color. **Global Analysis.** The entire dataset is analyzed. This analysis typically takes hours to days to complete. **Sampling Analysis.** Global quantities of the entire dataset are estimated by random sampling. It is possible to complete this analysis in seconds. **Regional Analysis.** Users analyze a well-defined, small, continuous unit of data from a potentially large dataset, such as genomic sequence alignments in the region of a gene. This analysis can also be completed in seconds.

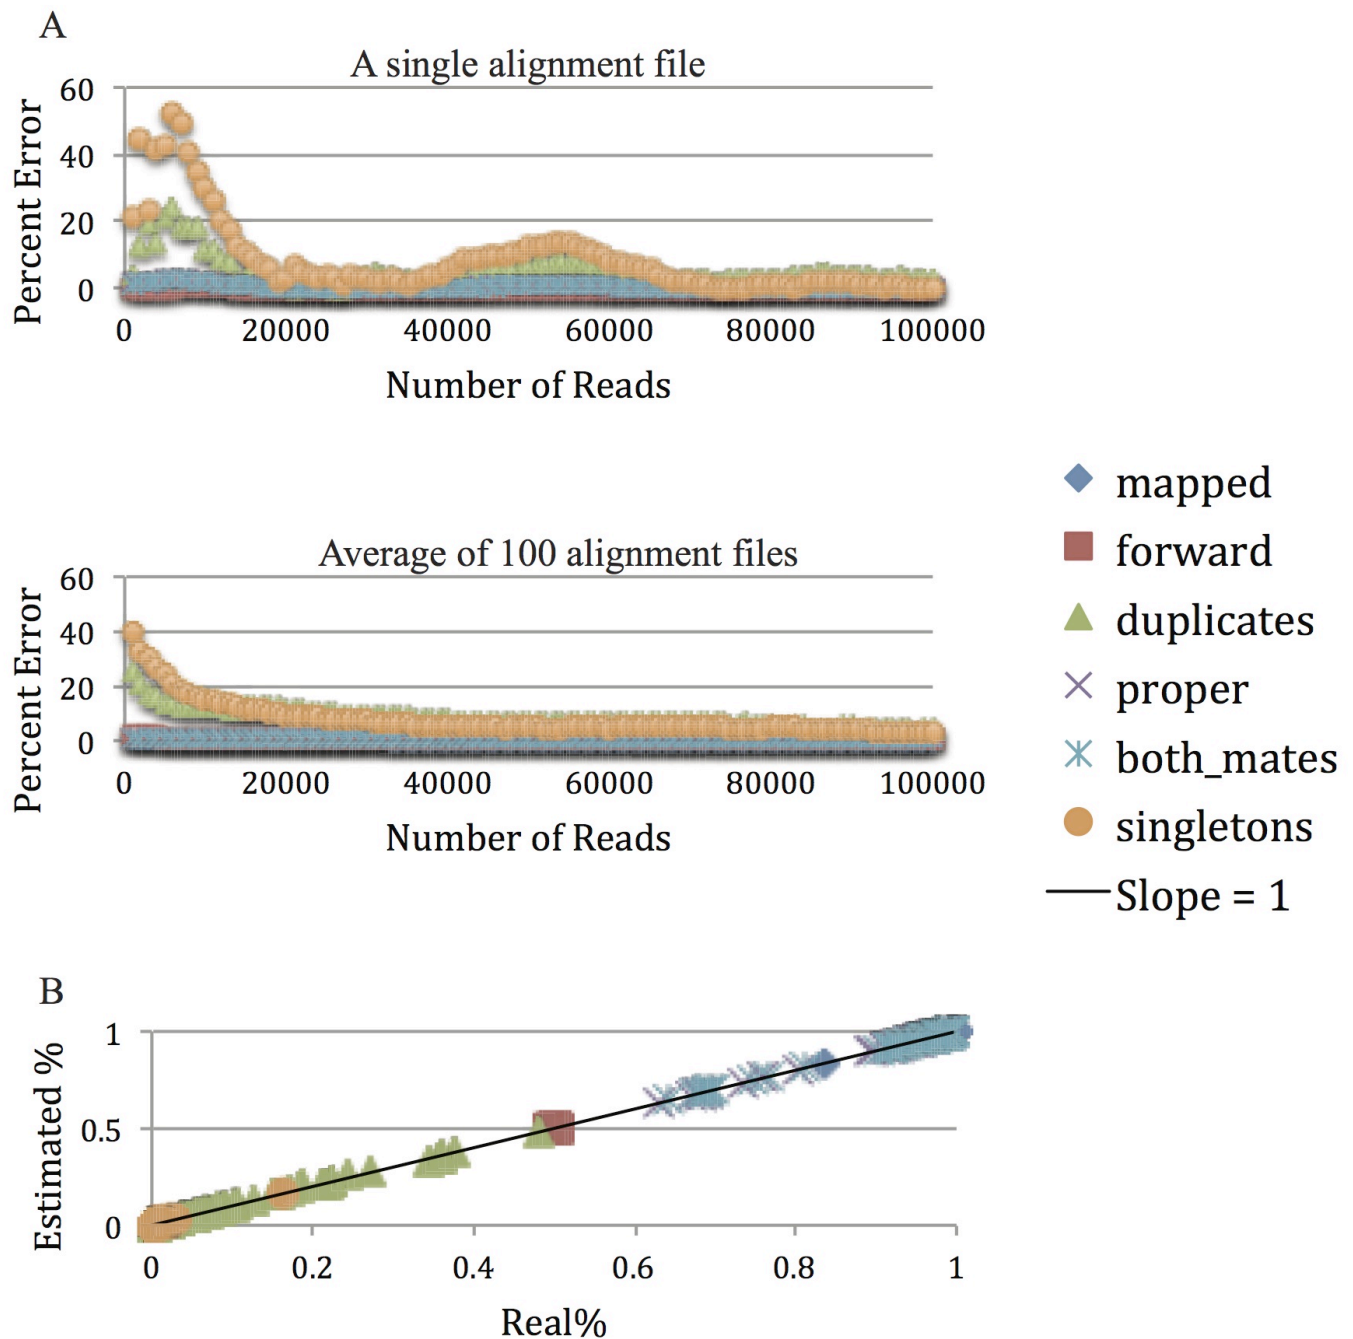

### Supplementary Figure 2

Accuracy of sampling-based estimation of alignment file metrics

Sampling analysis of six metrics performed by BAM.IOBIO.IO is compared to accurate values obtained via end-to-end analysis. (A) Here the percent error of the sampling analysis is shown for each metric as a function of the number of alignment records analyzed. The evaluation of a single alignment file is shown (top) as well as an average of 100 alignment files (bottom) from the 1000 Genomes project. [REF] (B) Estimated values obtained via random sampling of 100,000 reads are plotted against the accurate values of 100 alignment files.



Supplemental Note 1, Scalability and Deployment, Licensing, and Implementation Details.

### **Scalability and Deployment**

To ensure the necessary resources to provide real-time experience, BAM.IOBIO (and other IOBIO apps) has several deployment options that make this app viable for a very wide user base. First, users can access the web application from our own web servers, which are running on a powerful Amazon Cloud server, allowing many simultaneous analysis instances. If this app were to reach a larger user base, more servers and more powerful ones could be easily spun up to handle the increased demand. Second, because all source code is freely available, institutions with high usage will be able to offer this app running on their own systems for their users, distributing the computational load. Third, we are also working on solutions that will enable power users with the click of a button to “spin up” their own Amazon cloud servers to ensure high performance at their own (insubstantial) cost.

### **License**

BAM.IOBIO uses the MIT License.

### **Implementation Details**

BAM.IOBIO is a Javascript and HTML web application using HTML5 websockets for streaming data transfer and D3.js (<http://d3js.org>) for image creation. A web service (at <http://bamstatsalive.iobio.io>) running the UNIX program **Bamstatsalive** (<https://github.com/yiq/bamstatsAlive>), built with the Bamtools<sup>6</sup> API, is used to generate all alignment statistics. BAM.IOBIO requires that the browser in which the user runs the app supports websockets and the D3 JavaScript library: it currently works on the latest versions of the Chrome, Firefox, Safari and Internet Explorer browsers (see Supplementary Table 2). While some lower-performance WiFi networks and web proxy services do not support the advanced web features required by this application, we have found that BAM.IOBIO works well in most environments.

### Supplemental Table 1, Time Evaluation

Duration of sampling analysis compared to whole file analysis is shown for a low coverage full genome dataset and an exome dataset from the 1000 Genome Project.

| <b>Sample Type (filesize)</b> | <b>Sampled Analysis Time</b> | <b>While File Analysis Time</b> |
|-------------------------------|------------------------------|---------------------------------|
| Low Coverage (18gb)           | 6.4 seconds                  | ~8 hours                        |
| Exome (14gb)                  | 5.6 seconds                  | ~6 hours                        |

# BAM.IOBIO Platform Compatibility

| Test Case                             | MacOS  |         |        | Linux (Ubuntu) |        | Windows |        |         | MacOSX - iPad |        | MacOSX iPhone5 |         | Android Phone |
|---------------------------------------|--------|---------|--------|----------------|--------|---------|--------|---------|---------------|--------|----------------|---------|---------------|
|                                       | Chrome | Firefox | Safari | Firefox        | Chrome | IE11    | Chrome | Firefox | Chrome        | Safari | Chrome         | Safari  | Chrome        |
|                                       | 37.0   | 32.0    | 7.0    | 32             | 37     | 11      | 37.0   | 32.0    | 30            | 7.0    | 37.0           | 7.0     | 37.0          |
| Load BAM file from URL                | Pass   | Pass    | Pass   | Pass           | Pass   | Pass    | Pass   | Pass    | Pass          | Pass   | Pass           | Pass    | Pass          |
| Load local BAM file                   | Pass   | Pass    | Pass   | Pass           | Pass   | Pass    | Pass   | Pass    | n/a           | n/a    | n/a            | n/a     | n/a           |
| Increase sample size 3X               | Pass   | Pass    | Pass   | Pass           | Pass   | Pass    | Pass   | Pass    | Pass          | Pass   | Pass           | Pass    | Pass          |
| Subselect region on depth chart       | Pass   | Pass    | Pass   | Pass           | Pass   | Pass    | Pass   | Pass    | Pass          | Pass   | Pass           | Pass    | Pass          |
| Subselect regions in quick succession | Pass   | Pass    | Pass   | Pass           | Pass   | Limited | Pass   | Pass    | Pass          | Pass   | Pass           | Limited | Pass          |
| Use default BED file                  | Pass   | Pass    | Pass   | Pass           | Pass   | Pass    | Pass   | Pass    | Pass          | Pass   | Pass           | Pass    | Pass          |
| Use custom BED file                   | Pass   | Pass    | Pass   | Pass           | Pass   | Pass    | Pass   | Pass    | n/a           | n/a    | n/a            | n/a     | n/a           |

Supplemental Table 2, BAM.IOBIO Platform Compatibility

This table shows the outcome of testing major functionalities on a variety of platforms and browsers. Local file upload is not applicable (n/a) on mobile devices. With certain browser / platform combinations, selecting regions in quick succession may cause the app to become unresponsive (Limited).
